# Supplementary material for: Phylogeography of Nasutitermes corniger (Isoptera: Termitidae) in the Neotropical Region
Source: PubMed Central journal article supplement (PMC5701342; doi:10.1186/s12862-017-1079-8), 2017-11-23

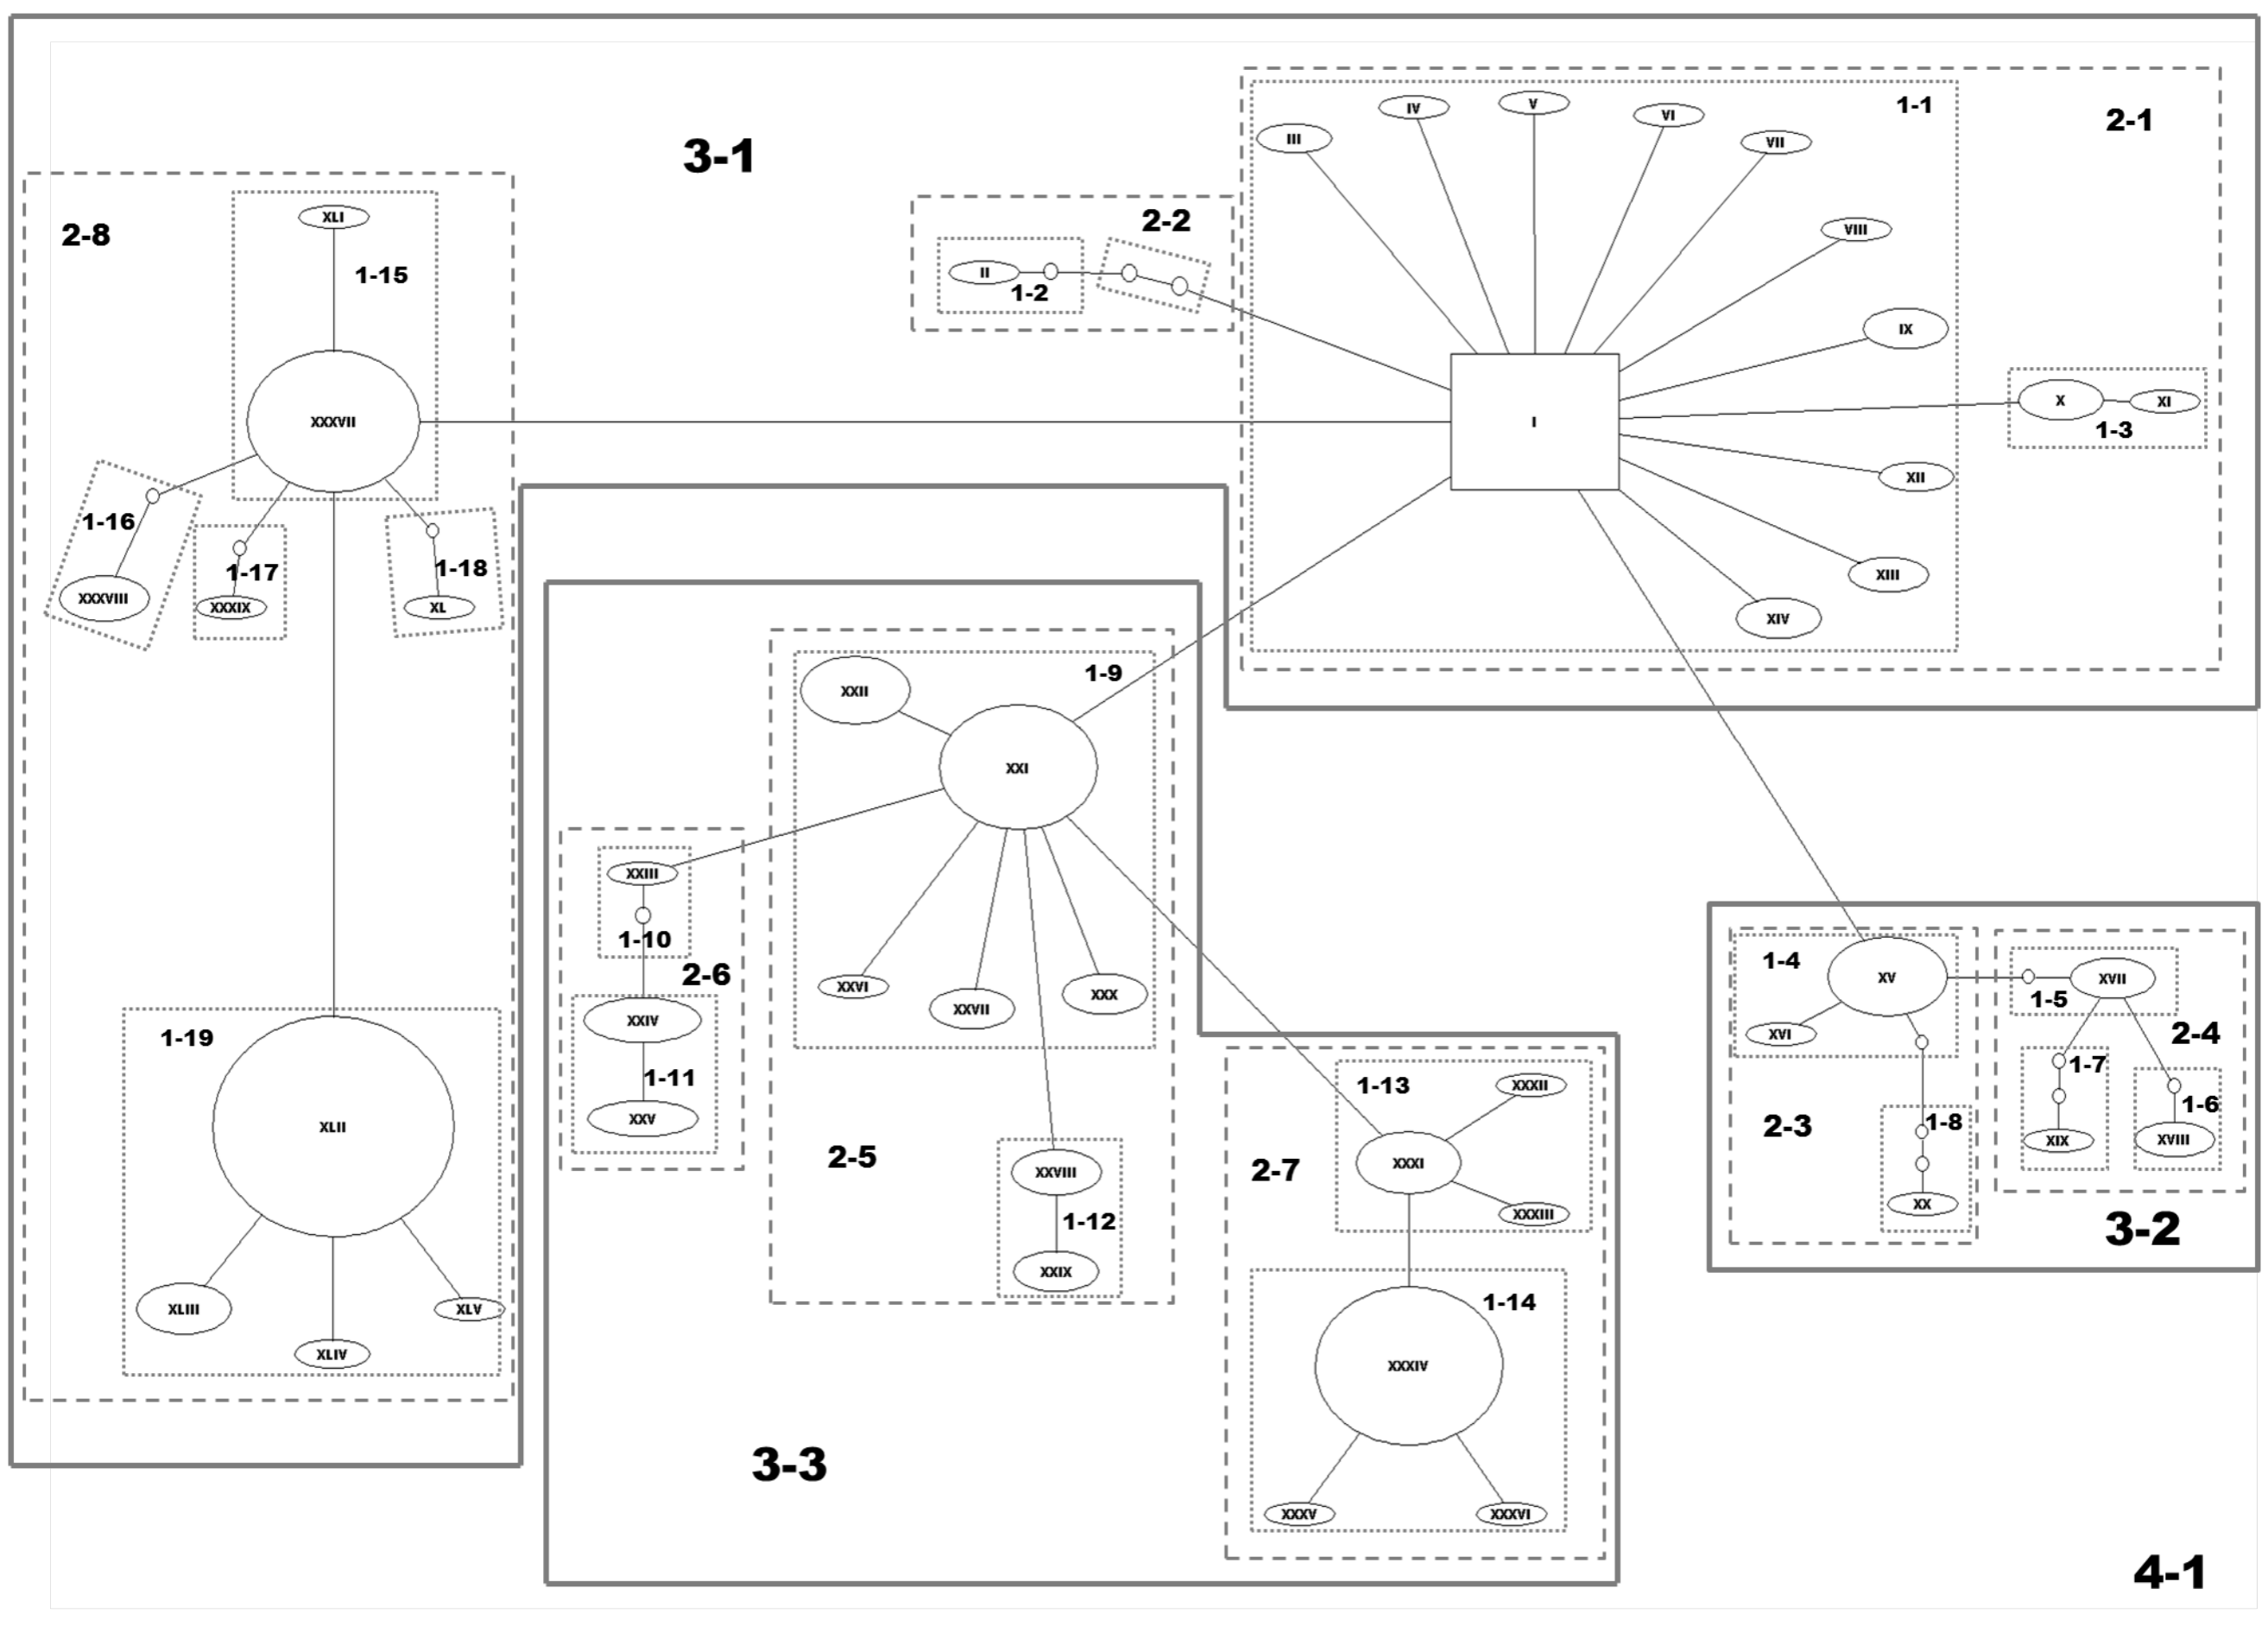

Supplement: 12862_2017_1079_MOESM3_ESM.pdf [file 12862_2017_1079_MOESM3_ESM.pdf]
